# Supplementary material
Source: Springer Nature journal article supplement (https://www.springermedizin.de/resource/supplementary/13058_2011_2960_MOESM3_ESM.pdf/9702974)

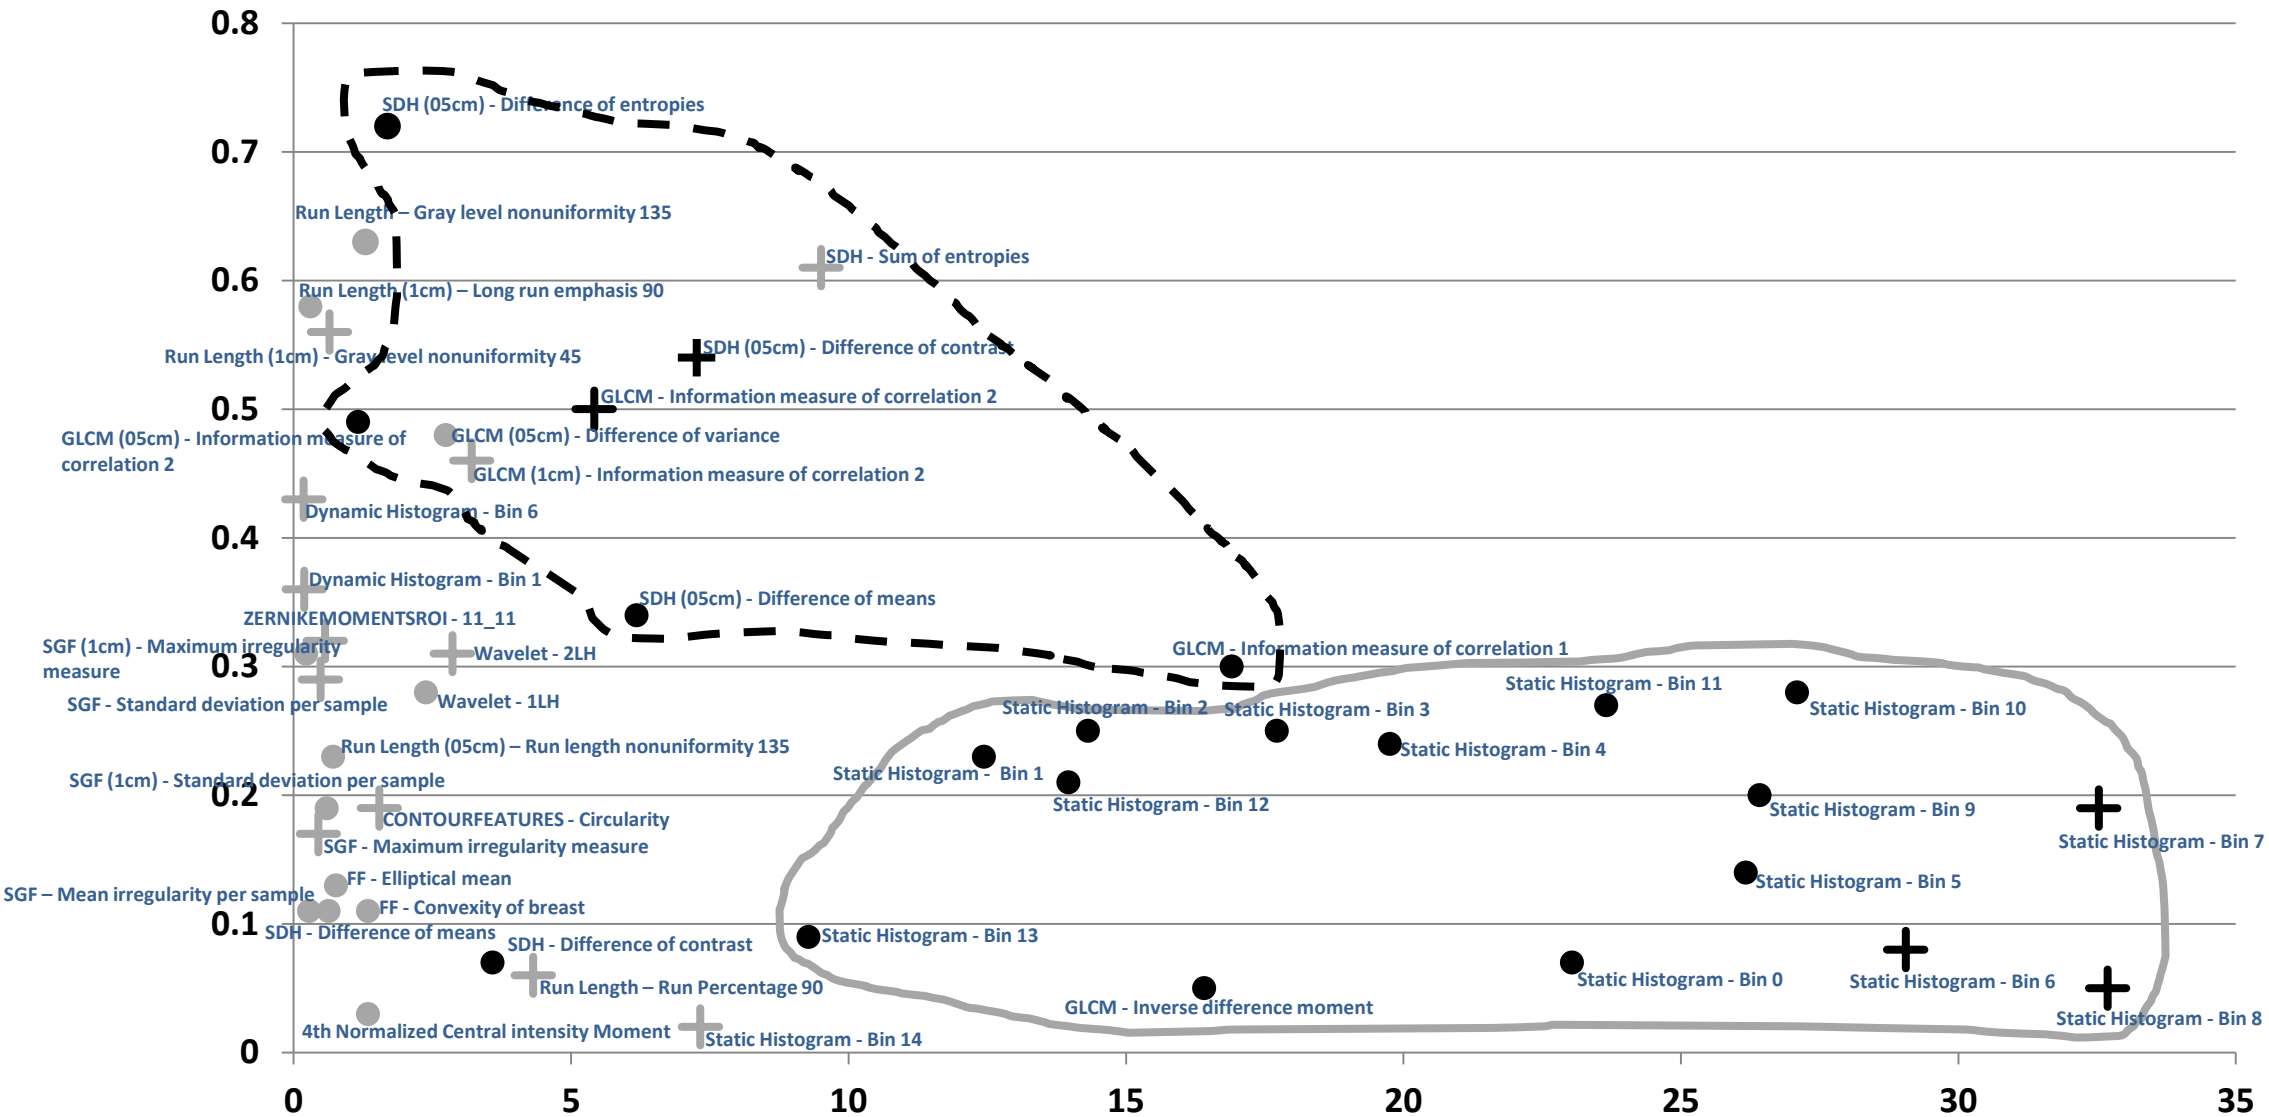

Supplement: MOESM3 [file 9702974]
